# Supplementary material for: AKT isoform-specific expression and activation across cancer lineages
Source: Springer Nature journal article supplement (doi:10.1186/s12885-018-4654-5), 2018-07-16

# Additional file 2

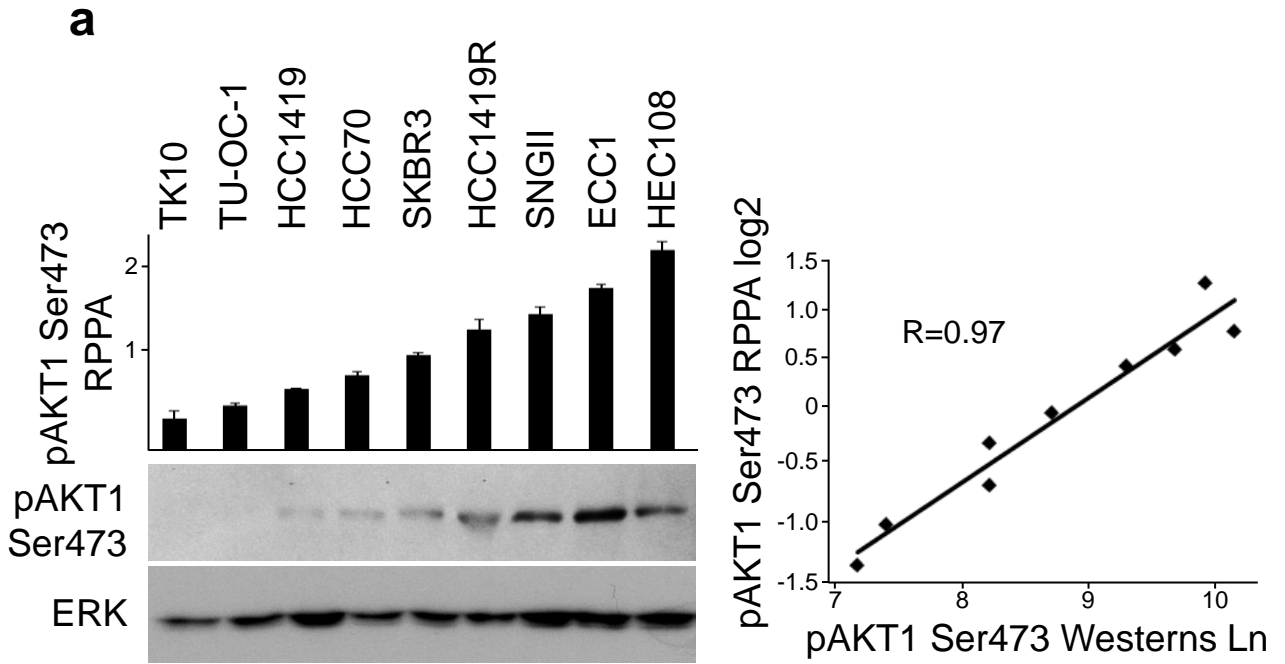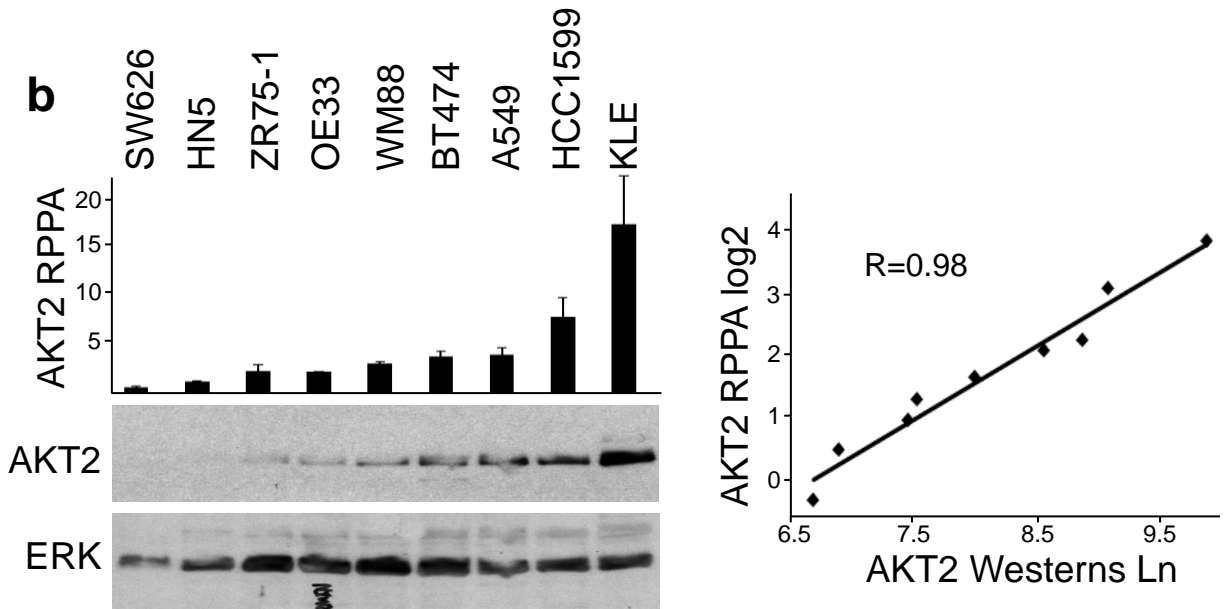

# Additional file 2

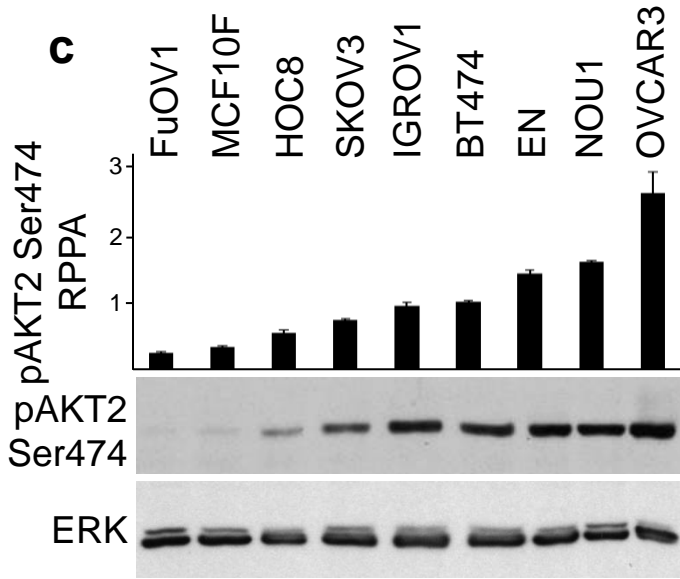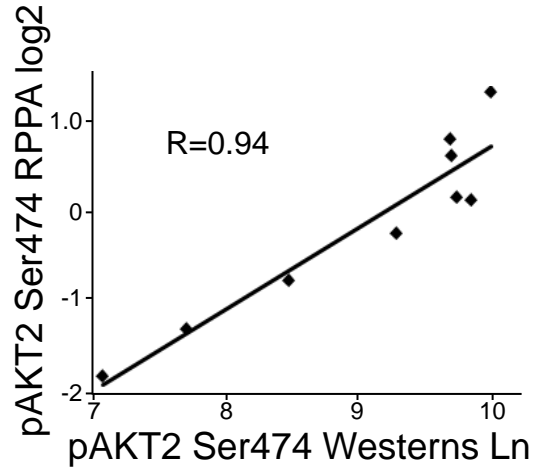

Supplement: MOESM2 [file 15956598]
