# Supplementary material for: AKT isoform-specific expression and activation across cancer lineages
Source: Springer Nature journal article supplement (doi:10.1186/s12885-018-4654-5), 2018-07-16

# Additional file 3

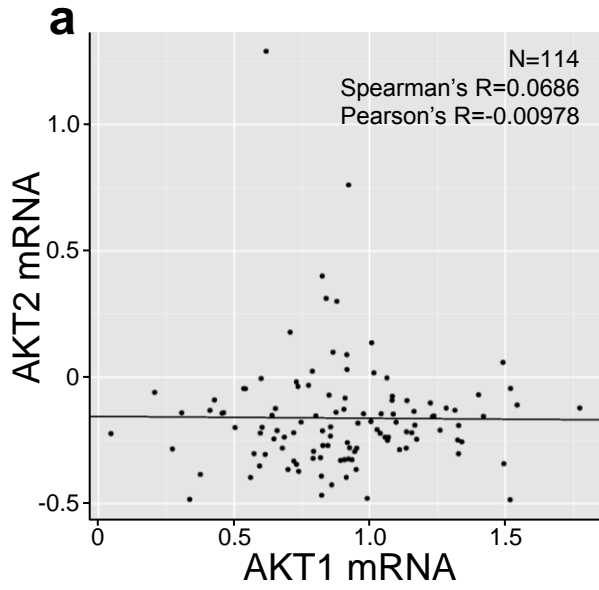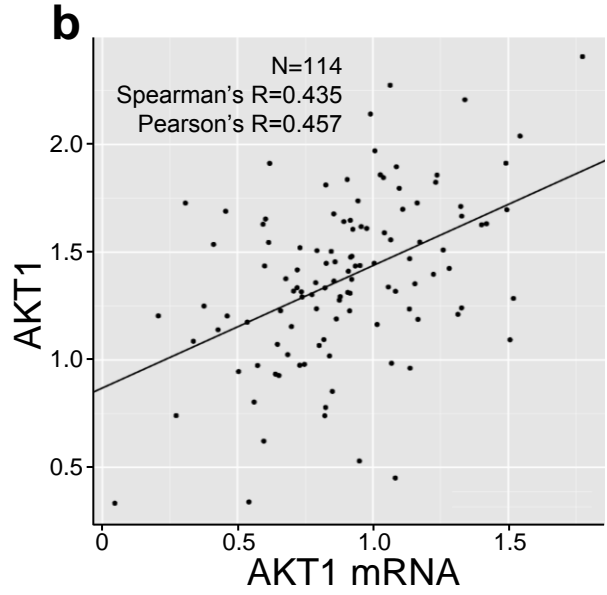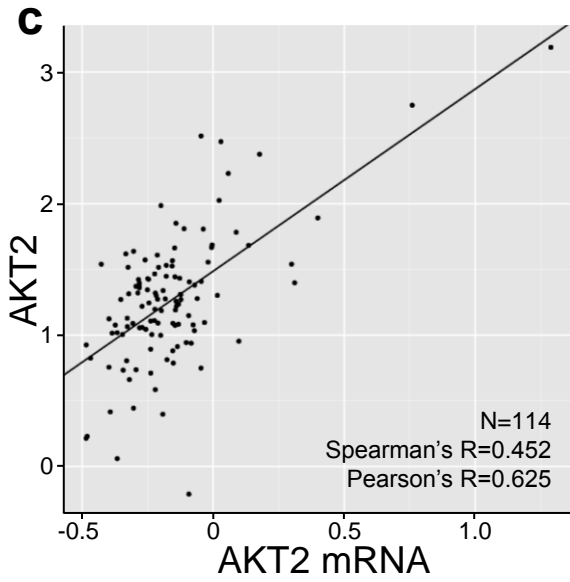

Supplement: MOESM3 [file 15956598]
